# Supplementary material for: Sweat Testing for the Detection of Methylone after Controlled Administrations in Humans
Source: MDPI journal article supplement (doi:10.3390/ijms24087395), 2023-04-17
Supplement: s1 [file s1]

# Supplementary Material

Table S1. Method validation parameters.

|           | Linear range<br>(ng/patch) | r <sup>2</sup> | p-value | F <sub>crit95%</sub> | LOD<br>(ng/patch) | LOQ<br>(ng/patch) | QC<br>(ng/patch) |      |      | Accuracy<br>(%) |       |       | Intra-day<br>imprecision<br>(CV%) |     |     | Inter-day<br>imprecision<br>(CV%) |     |     | Recovery<br>(%) |      |       | Matrix effect<br>(%) |      |      |
|-----------|----------------------------|----------------|---------|----------------------|-------------------|-------------------|------------------|------|------|-----------------|-------|-------|-----------------------------------|-----|-----|-----------------------------------|-----|-----|-----------------|------|-------|----------------------|------|------|
|           |                            |                |         |                      |                   |                   | L                | M    | H    | L               | M     | H     | L                                 | M   | H   | L                                 | M   | H   | L               | M    | H     | L                    | M    | H    |
| Methylone | 5-10000                    | 0.9988         | 2.764   | 0.563                | 1.5               | 5.0               | 15               | 4000 | 8000 | 101.3           | 103.2 | 99.3  | 5.2                               | 3.7 | 2.1 | 4.2                               | 4.1 | 5.2 | 101.2           | 97.4 | 101.1 | 4.7                  | 3.1  | 2.7  |
| MDC       | 0.5-100                    | 0.9996         | 0.546   | 2.675                | 0.2               | 0.5               | 1.5              | 40   | 80   | 94.8            | 97.4  | 98.8  | 0.7                               | 2.7 | 5.2 | 1.7                               | 2.8 | 2.1 | 98.1            | 97.9 | 96.2  | 0.5                  | -2.5 | -0.5 |
| HMMC      | 0.5-100                    | 0.9999         | 0.741   | 0.908                | 0.2               | 0.5               | 1.5              | 40   | 80   | 108.1           | 94.8  | 107.2 | 1.3                               | 2.1 | 2.9 | 3.3                               | 7.1 | 3.8 | 103.3           | 99.3 | 101.4 | -2.1                 | 1.6  | -6.1 |

Abbreviations: CV, coefficient of variation; H, high-quality control; HMMC, 4-hydroxy-3-methoxy-N-methylcathinone; L, low-quality control; LOD, limit of detection; LOQ, limit of quantification; M, medium-quality control; MDC, methylenedioxycathinone; QC, quality control; r<sup>2</sup>, correlation coefficient.
